# Supplementary material for: Blimp-1 Contributes to the Development and Function of Regulatory B Cells
Source: PubMed Central journal article supplement (PMC6702260; doi:10.3389/fimmu.2019.01909), 2019-08-14
Supplement: Presentation_1.pdf [file Presentation_1.pdf]

## *Supplementary Material*

# **Blimp-1 Contributes to the Development and Function of Regulatory B Cells**

**Ying-Hsiu Wang<sup>1,2</sup>, Dong-Yan Tsai<sup>2</sup>, Yi-An Ko<sup>2</sup>, Tsan-Tzu Yang<sup>2,3</sup>, I-Ying Lin<sup>2</sup>,  
Kuo-Hsuan Hung<sup>2</sup>, and Kuo-I Lin<sup>1,2,3,\*</sup>**

<sup>1</sup>Graduate Institute of Life Sciences, National Defense Medical Center, Taipei 114, Taiwan;

<sup>2</sup>Genomics Research Center, Academia Sinica, Taipei 115, Taiwan;

<sup>3</sup> Graduate Institute of Immunology, College of Medicine, National Taiwan University, Taipei 110, Taiwan

**\*Corresponding author:**

Kuo-I Lin (ORCID 0000-0003-4477-0798)

Genomics Research Center, Academia Sinica, 128 Academia Road, Sec. 2, Nankang Dist.,  
Taipei 115, Taiwan

Phone: +886-2-2787-1253

Fax: +886-2-2789-9931

Email: [kuoilin@gate.sinica.edu.tw](mailto:kuoilin@gate.sinica.edu.tw)

### **SUPPLEMENTARY TABLE AND FIGURES**

**SUPPLEMENTARY TABLE 1. Differentially expressed genes in IL-10<sup>+</sup> and IL-10<sup>-</sup> splenic B cells stimulated with LPS or anti-CD40 antibody.**

**SUPPLEMENTARY TABLE 2. Microarray analysis of the expression of genes with more than 1.5-fold changes in Cko B10 cells before and 48 h after anti-CD40 stimulation.**

**SUPPLEMENTARY FIGURE 1. Proliferation and apoptosis rates in Ctrl and Cko B10**

**cells after stimulation.**

**SUPPLEMENTARY FIGURE 2. Gross pathology of kidneys from Ctrl and Cko mice infected with *C. albicans*.**

**SUPPLEMENTARY FIGURE 3. B10 cells differentiated into CD138<sup>+</sup> plasmablasts after LPS stimulation.**

**SUPPLEMENTARY FIGURE 4. Adoptive transfer of serum from *C. albicans* infected mice reduced the mortality caused by *C. albicans* infection in Cko mice.**

**SUPPLEMENTARY TABLE 1. Differentially expressed genes in IL-10<sup>+</sup> and IL-10<sup>-</sup> splenic B cells stimulated with LPS or anti-CD40 antibody.** Microarray analysis revealed the up- and down-regulated genes in IL-10<sup>+</sup> splenic B cells after stimulation, as compared with IL-10<sup>-</sup> splenic B cells. Thirty-four and four genes were up- and down-regulated, respectively (fold changes of  $\geq 1.8$ ), in IL-10<sup>+</sup> B cells as compared with IL-10<sup>-</sup> B cells. Two independent experiments were performed.

| Probe Set ID | Experiment 1 |            | Experiment 1       |            | Experiment 2 |            | Experiment 2       |            | Gene           | Entrez Gene | Alignments                                     |
|--------------|--------------|------------|--------------------|------------|--------------|------------|--------------------|------------|----------------|-------------|------------------------------------------------|
|              | LPS          |            | anti-CD40 antibody |            | LPS          |            | anti-CD40 antibody |            |                |             |                                                |
|              | Fold Change  | Regulation | Fold Change        | Regulation | Fold Change  | Regulation | Fold Change        | Regulation |                |             |                                                |
| 1450330_at   | 5.29521      | up         | 12.714221          | up         | 4.292656     | up         | 10.32317           | up         | <i>Il10</i>    | 16153       | chr1:131019846-131024970 (+) // 99.09 // qE4   |
| 1422707_at   | 4.3830457    | up         | 2.0213315          | up         | 3.1081445    | up         | 3.0763001          | up         | <i>Pik3cg</i>  | 30955       | chr12:32173132-32208470 (-) // 88.11 // qA3    |
| 1439897_at   | 4.304222     | up         | 5.0168533          | up         | 3.3988318    | up         | 3.5492852          | up         | <i>Nebl</i>    | 74103       | chr2:17375018-17390982 (-) // 99.87 // qA3     |
| 1420425_at   | 4.285112     | up         | 11.076121          | up         | 3.0637705    | up         | 6.451456           | up         | <i>Prdm1</i>   | 12142       | chr10:44437174-44458748 (-) // 94.56 // qB2    |
| 1417995_at   | 3.292895     | up         | 3.5207381          | up         | 2.2172718    | up         | 2.0241675          | up         | <i>Ptpn22</i>  | 19260       | chr3:103860291-103912247 (+) // 94.29 // qF2.2 |
| 1417392_a_at | 3.2892392    | up         | 4.4193306          | up         | 2.0447004    | up         | 2.2043543          | up         | <i>Slc7a7</i>  | 20540       | chr14:54369373-54409051 (-) // 90.25 // qC2    |
| 1429775_a_at | 2.9582744    | up         | 2.026032           | up         | 1.8286815    | up         | 4.024682           | up         | <i>Gpr137b</i> | 83924       | chr13:12616893-12650380 (-) // 99.48 // qA1    |
| 1428942_at   | 2.9540799    | up         | 8.978006           | up         | 2.6136837    | up         | 6.330001           | up         | <i>Mt2</i>     | 17750       | chr8:94172781-94173564 (+) // 93.29 // qC5     |
| 1436649_at   | 2.94711      | up         | 2.548358           | up         | 2.0841537    | up         | 2.1637824          | up         | <i>Ikzf3</i>   | 22780       | chr11:98464895-98466043 (-) // 84.31 // qD     |
| 1434252_at   | 2.945844     | up         | 5.3405695          | up         | 2.3646157    | up         | 2.11213            | up         | <i>Tmcc3</i>   | 319880      | chr10:94588022-94590098 (+) // 89.71 // qC2    |
| 1455660_at   | 2.8591983    | up         | 4.974766           | up         | 2.3839257    | up         | 4.3152986          | up         | <i>Csf2rb</i>  | 12983       | chr15:78350198-78350997 (+) // 97.78 // qE1    |
| 1422557_s_at | 2.7599635    | up         | 5.329776           | up         | 2.2777429    | up         | 3.9664156          | up         | <i>Mt1</i>     | 17748       | chr8:94179141-94180327 (+) // 55.44 // qC5     |
| 1450297_at   | 2.7019446    | up         | 2.4143407          | up         | 3.1647139    | up         | 1.9088011          | up         | <i>Il6</i>     | 16193       | chr5:30013143-30019968 (+) // 90.85 // qB1     |

| Probe Set ID | Experiment 1 |            | Experiment 1       |            | Experiment 2 |            | Experiment 2       |            | Gene              | Entrez Gene | Alignments                                   |
|--------------|--------------|------------|--------------------|------------|--------------|------------|--------------------|------------|-------------------|-------------|----------------------------------------------|
|              | LPS          |            | anti-CD40 antibody |            | LPS          |            | anti-CD40 antibody |            |                   |             |                                              |
|              | Fold Change  | Regulation | Fold Change        | Regulation | Fold Change  | Regulation | Fold Change        | Regulation |                   |             |                                              |
| 1427577_x_at | 2.6779115    | up         | 2.2451954          | up         | 2.065782     | up         | 2.1219835          | up         | <i>Igk-V21</i>    | 16071       | chr6:70371872-70726738 (+) // 50.13 // qC1   |
| 1450140_a_at | 2.674659     | up         | 5.1833787          | up         | 2.5587728    | up         | 3.4741762          | up         | <i>Cdkn2a</i>     | 12578       | chr4:89274544-89294599 (-) // 89.22 // qC4   |
| 1416808_at   | 2.6027803    | up         | 3.7149382          | up         | 3.221675     | up         | 2.3177993          | up         | <i>Nid1</i>       | 18073       | chr13:13437601-13512275 (+) // 92.63 // qA1  |
| 1416066_at   | 2.5760148    | up         | 2.4849408          | up         | 1.9680418    | up         | 2.3939195          | up         | <i>Cd9</i>        | 12527       | chr6:125460265-125494765 (-) // 92.74 // qF3 |
| 1449152_at   | 2.5496545    | up         | 5.7169304          | up         | 2.9264941    | up         | 2.2581322          | up         | <i>Cdkn2b</i>     | 12579       | chr4:89306286-89310993 (-) // 99.2 // qC4    |
| 1420450_at   | 2.5078306    | up         | 2.4896743          | up         | 2.8194594    | up         | 1.8753654          | up         | <i>Mmp10</i>      | 17384       | chr9:7502341-7510238 (+) // 98.52 // qA1     |
| 1419298_at   | 2.4851675    | up         | 3.0290012          | up         | 2.3365417    | up         | 3.9852161          | up         | <i>Pon3</i>       | 269823      | chr6:5221350-5256278 (-) // 98.08 // qA1     |
| 1451951_at   | 2.362497     | up         | 4.441163           | up         | 2.8539584    | up         | 1.9155523          | up         | <i>Igk</i>        | 243469      | chr6:68256581-68256866 (+) // 38.61 // qC1   |
| 1419249_at   | 2.345807     | up         | 2.1448216          | up         | 2.2939608    | up         | 5.3039994          | up         | <i>Cdk14</i>      | 18647       | chr5:4803384-5380251 (-) // 97.47 // qA1     |
| 1424927_at   | 2.2323787    | up         | 2.299978           | up         | 2.0620165    | up         | 1.8619931          | up         | <i>Glipr1</i>     | 73690       | chr10:111985454-111997264 (-) // 91.1 // qD2 |
| 1427837_at   | 2.20593      | up         | 4.8589444          | up         | 2.3319187    | up         | 3.8068845          | up         | <i>Igkv15-103</i> | 692169      | chr6:68437642-68437928 (+) // 52.31 // qC1   |
| 1427860_at   | 2.1379027    | up         | 2.278748           | up         | 1.9711353    | up         | 2.2426953          | up         | <i>Igkv6-15</i>   | 108022      | chr6:70406465-70406736 (-) // 86.73 // qC1   |
| 1420679_a_at | 2.0804083    | up         | 1.8736295          | up         | 2.2257009    | up         | 2.1644626          | up         | <i>Aigl</i>       | 66253       | chr10:13652450-13868957 (-) // 96.23 // qA2  |
| 1455854_a_at | 2.0626478    | up         | 2.6412814          | up         | 1.9874107    | up         | 2.2677712          | up         | <i>Ssh1</i>       | 231637      | chr5:113939764-113941100 (-) // 71.58 // qF  |
| 1423311_s_at | 1.985859     | up         | 3.9583142          | up         | 2.306383     | up         | 2.8652906          | up         | <i>Tpbp</i>       | 21983       | chr9:85842379-85847055 (+) // 93.8 // qE3.1  |
| 1430523_s_at | 1.9613429    | up         | 2.916712           | up         | 1.8423766    | up         | 3.700013           | up         | <i>Iglv1</i>      | 16142       | chr16:19084852-19085498 (-) // 99.82 // qA3  |
| 1416431_at   | 1.936019     | up         | 2.074861           | up         | 1.9593635    | up         | 1.8447341          | up         | <i>Tubb6</i>      | 67951       | chr18:67390729-67402752 (+) // 94.69 // qE1  |
| 1419665_a_at | 1.8736795    | up         | 3.4004576          | up         | 3.0027506    | up         | 2.764955           | up         | <i>Nupr1</i>      | 56312       | chr7:126623247-126625475 (-) // 93.05 // qF3 |

| Probe Set ID | Experiment 1 |            | Experiment 1       |            | Experiment 2 |            | Experiment 2       |            | Gene          | Entrez Gene | Alignments                                    |
|--------------|--------------|------------|--------------------|------------|--------------|------------|--------------------|------------|---------------|-------------|-----------------------------------------------|
|              | LPS          |            | anti-CD40 antibody |            | LPS          |            | anti-CD40 antibody |            |               |             |                                               |
|              | Fold Change  | Regulation | Fold Change        | Regulation | Fold Change  | Regulation | Fold Change        | Regulation |               |             |                                               |
| 1447918_x_at | 1.8658237    | up         | 2.0910437          | up         | 1.8439312    | up         | 2.1277769          | up         | <i>Iglc2</i>  | 110786      | chr16:19198400-19198554 (-) // 86.63 // qA3   |
| 1418340_at   | 1.8390578    | up         | 2.1524723          | up         | 3.4976294    | up         | 9.314293           | up         | <i>Fcer1g</i> | 14127       | chr1:171229576-171234309 (-) // 88.6 // qH3   |
| 1424931_s_at | 1.8093346    | up         | 2.8896892          | up         | 1.8624929    | up         | 3.18194            | up         | <i>Iglc1</i>  | 16142       | chr16:19061618-19085499 (-) // 99.77 // qA3   |
| 1455530_at   | 5.299976     | down       | 3.403353           | down       | 5.44376      | down       | 2.872428           | down       | <i>Ighd</i>   | 380797      | chr12:113406604-113416235 (-) // 71.12 // qF1 |
| 1422122_at   | 2.6667225    | down       | 2.4160252          | down       | 3.0335176    | down       | 6.074062           | down       | <i>Fcer2a</i> | 14128       | chr8:3681805-3694174 (-) // 72.11 // qA1.1    |
| 1430558_at   | 2.506817     | down       | 2.268199           | down       | 2.5393598    | down       | 1.9812241          | down       | <i>Zfp318</i> | 57908       | chr17:46413583-46414817 (+) // 100.0 // qC    |
| 1442544_at   | 2.0500302    | down       | 2.530094           | down       | 2.5675843    | down       | 3.9537458          | down       | <i>Ighg1</i>  | 16017       | chr12:113325242-113325950 (-) // 96.82 // qF1 |

**SUPPLEMENTARY TABLE 2. Microarray analysis of the expression of genes with more than 1.5-fold changes in Cko B10 cells before and 48 h after anti-CD40 stimulation.** B10 cells were sorted from Ctrl or Cko mice and subjected for anti-CD40 stimulation. Genes whose expression was changed for more than 1.5-fold in Cko B10 cells were listed in a separate Excel data sheet (Supplementary Table 2).

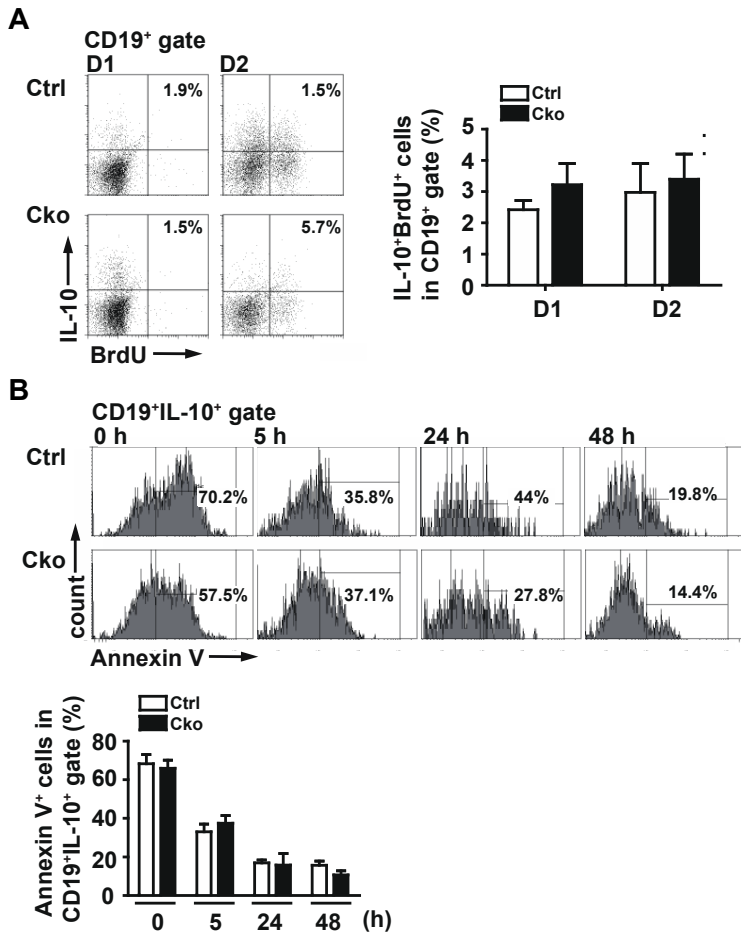

**SUPPLEMENTARY FIGURE 1. Proliferation and apoptosis rates in Ctrl and Cko B10 cells after stimulation.** (A) Splenic B cells from Ctrl or Cko mice were stimulated with LPS (10  $\mu\text{g}/\text{ml}$ ) for the indicated lengths of time as described previously. Cells were treated with 30  $\mu\text{M}$  5-bromo-2'-deoxyuridine (BrdU) for 2 h before being harvested. Data represent the BrdU<sup>+</sup> cells in the group of CD19<sup>+</sup>IL-10<sup>+</sup> cells. (B) Cells were collected at the indicated timepoints and subjected to Annexin V staining. All antibodies and reagents are from BD Bioscience, and the staining procedure was performed in accordance with the manufacturer's instructions. Data are the mean  $\pm$  SEM ( $n = 3\text{--}5$  mice per group). At least two independent experiments were performed.

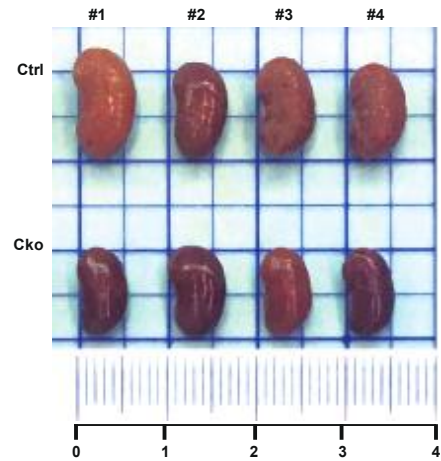

**SUPPLEMENTARY FIGURE 2. Gross pathology of kidneys from Ctrl and Cko mice infected with *C. albicans*.** Ctrl and Cko mice were infected with  $5 \times 10^5$  CFU of *C. albicans* by intravenous injection. Three days after infection, kidneys from infected mice were removed for comparison (n = 4 mice per group).

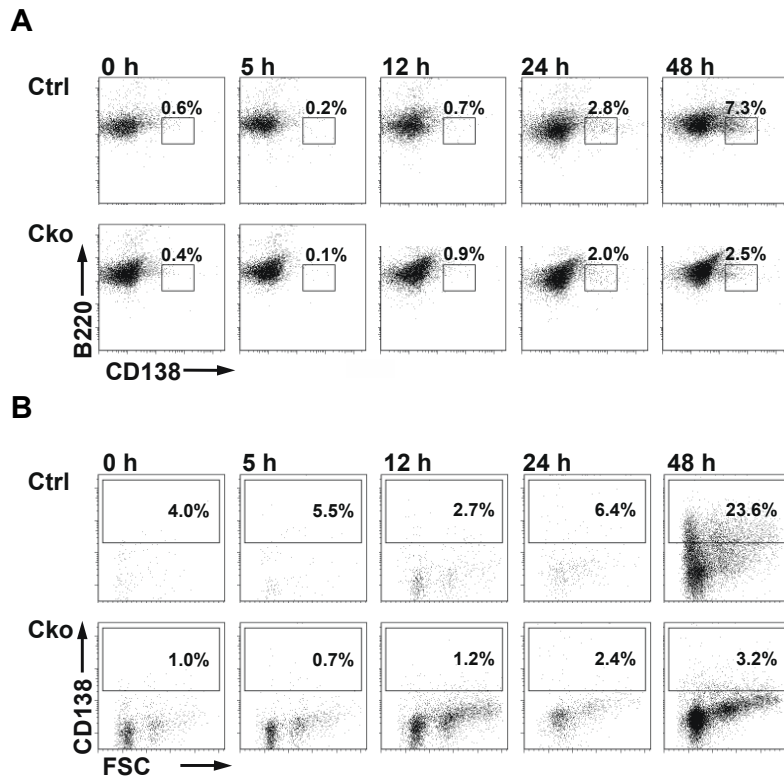

**SUPPLEMENTARY FIGURE 3. B10 cells differentiated into CD138<sup>+</sup> plasmablasts after LPS stimulation.** CD19<sup>+</sup>CD1d<sup>hi</sup>CD5<sup>+</sup> B10 cells were sorted from Ctrl × *tiger* or Cko × *tiger* mice and then stimulated with LPS (10 μg/ml) for the indicated lengths of time. **(A)** FACS analysis showing the frequency of CD138<sup>+</sup> plasmablasts. **(B)** FACS showing the frequency of CD138<sup>+</sup> in the IL-10<sup>+</sup> gate. Data are the mean ± SEM (n = 4 mice per group). Two independent experiments were performed.



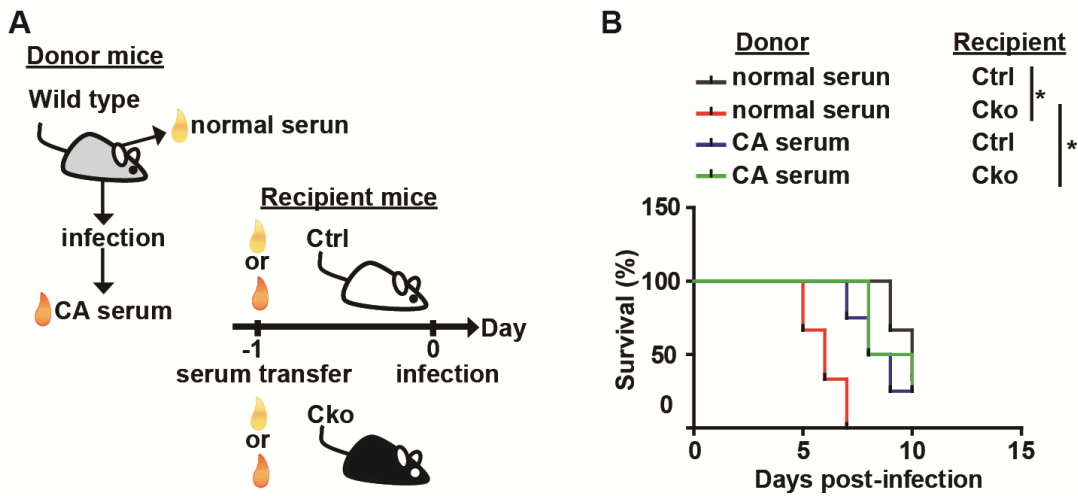

**SUPPLEMENTARY FIGURE 4. Adoptive transfer of serum from *C. albicans* infected mice reduced the mortality caused by *C. albicans* infection in Cko mice. (A) Schematic design for transfer of serum collected from day 14 *C. albicans* infected (CA serum) or uninfected (normal serum) wildtype C57BL/6 mice into Ctrl or Cko mice, followed by challenge with  $5 \times 10^5$  CFU of *C. albicans*. (B) The survival rate of Ctrl and Cko mice in (A) was recorded (n = 3–4 mice per group). The differences in survival rates were analyzed by a log-rank (Mantel-Cox) test. \*  $p < 0.05$ .**
